# Supplementary material for: Device Structure, Light Source Height, and Sunset Time Affect the Light-Trap Catching of Tea Leafhoppers
Source: MDPI journal article supplement (doi:10.3390/plants13020241), 2024-01-15
Supplement: s1 [file s1]

**Table S1.** Results of the repeated measures ANOVA conducted to analyze changes in tea leafhopper relative population density (LRPD) and the *E. onukii* population in section 4.5.

| Field location       | Mauchly | Time   |     | $T \times L$ |     |
|----------------------|---------|--------|-----|--------------|-----|
|                      | $p$     | $F$    | $p$ | $F$          | $p$ |
| Hangzhou             | 0.00    | 58.89  | *** | 3.71         | *   |
| Tongren              | 0.00    | 35.45  | *** | 9.47         | *** |
| Tongren <sup>a</sup> | 0.00    | 104.75 | *** | 9.5          | *** |
| Qionglai             | 0.02    | 162.38 | *** | 3.94         | *   |
| Wuyishan             | 0.00    | 51.86  | *** | 11.2         | **  |
| Songyang             | 0.01    | 64.24  | *** | 13.57        | **  |
| Nanchang             | 0.00    | 39.01  | *** | 8.62         | **  |

$F$  values and significance levels from the repeated measures ANOVA are shown for two main effects and their interactions. \*  $0.01 \leq p < 0.05$ , \*\*  $0.001 \leq p < 0.01$ , \*\*\*  $p < 0.001$ , ns = not significant,  $n = 5$ . When Mauchly's  $p < 0.05$ , Greenhouse–Geisser estimates were used to correct for sphericity.  $T$  = time,  $L$  = light trap.

<sup>a</sup> Data of the *E. onukii* population from a traditional method.
